# Supplementary material for: Identification of loci associated with conception rate in primiparous Holstein cows
Source: PubMed Central journal article supplement (PMC6852976; doi:10.1186/s12864-019-6203-2), 2019-11-12
Supplement: 12864_2019_6203_MOESM2_ESM.pdf [file 12864_2019_6203_MOESM2_ESM.pdf]

**Table S1.** Loci associated with cow conception rate at the first breeding.

| <b>BTA<sup>1</sup></b> | <b>ARS 1.2<br/>BP Position<sup>2</sup></b> | <b>UMD 3.1<br/>Position<sup>3</sup></b> | <b>SNP ID<sup>4,5</sup></b> | <b>Model<sup>6</sup></b> | <b>P-Value<sup>7</sup></b> |
|------------------------|--------------------------------------------|-----------------------------------------|-----------------------------|--------------------------|----------------------------|
| UK                     | UK                                         | BTAX<br>123,316,017                     | <i>rs134099044</i>          | Additive<br>Dominant     | 2.75E-09<br>2.75E-09       |
| 1                      | 716,721                                    | 36,337                                  | <i>rs132895573*</i>         | Recessive                | 2.16E-09                   |
| 1                      | 17,190,292                                 | 16,670,513                              | <i>rs136034629*</i>         | Recessive                | 1.52E-08                   |
| 1                      | 26,123,942                                 | 25,626,521                              | <i>rs43222718</i>           | Dominant                 | 3.43E-09                   |
| 1                      | 33,136,647                                 | 32,700,496                              | <i>rs43226666*</i>          | Additive<br>Dominant     | 4.55E-10<br>2.84E-13       |
| 1                      | 33,522,801                                 | 33,086,024                              | <i>rs43226580*</i>          | Dominant                 | 1.71E-12                   |
| 1                      | 36,101,420                                 | 35,698,088                              | <i>rs43226992</i>           | Additive                 | 3.96E-09                   |
| 1                      | 61,470,011                                 | 62,056,267                              | <i>rs42760220</i>           | Additive<br>Dominant     | 1.47E-09<br>2.13E-10       |
| 1                      | 72,665,912                                 | 73,273,238                              | <i>rs137394358*</i>         | Dominant                 | 2.07E-08                   |
| 1                      | 82,457,094                                 | 83,047,838                              | <i>rs109289667</i>          | Recessive                | 1.10E-09                   |
| 1                      | 84,573,157                                 | 85,187,247                              | <i>rs43247724</i>           | Additive<br>Dominant     | 2.45E-08<br>2.45E-08       |
| 1                      | 85,375,697                                 | 86,006,808                              | <i>rs29025180</i>           | Dominant                 | 2.63E-08                   |
| 1                      | 98,891,232                                 | 99,689,088                              | <i>rs110245908</i>          | Dominant                 | 4.09E-09                   |
| 1                      | 99,081,740                                 | 99,879,710                              | <i>rs137156811</i>          | Additive<br>Dominant     | 3.63E-21<br>3.63E-21       |
| 1                      | 113,023,021                                | 113,931,474                             | <i>rs42215584</i>           | Additive<br>Dominant     | 3.97E-19<br>7.54E-21       |
| 1                      | 123,269,176                                | 124,246,283                             | <i>rs41575917</i>           | Recessive                | 1.66E-09                   |
| 1                      | 127,938,641                                | 128,938,068                             | <i>rs43265135*</i>          | Additive<br>Dominant     | 1.05E-10<br>2.62E-13       |
| 1                      | 138,454,971                                | 139,950,787                             | <i>rs43278206</i>           | Dominant                 | 5.54E-10                   |
| 1                      | 141,690,171                                | 143,188,538                             | <i>rs134923101</i>          | Recessive                | 1.92E-10                   |
| 1                      | 155,709,024                                | 157,448,783                             | <i>rs43285260</i>           | Recessive                | 1.51E-09                   |
| 2                      | 4,950,986                                  | 4,883,261                               | <i>rs108949806</i>          | Dominant                 | 1.79E-10                   |
| 2                      | 13,489,742                                 | 13,518,945                              | <i>rs137280033</i>          | Additive<br>Dominant     | 1.65E-09<br>1.65E-09       |
| 2                      | 33,584,278                                 | 33,688,017                              | <i>rs110717447</i>          | Recessive                | 2.93E-09                   |
| 2                      | 53,451,414                                 | 53,552,010                              | <i>rs42534341</i>           | Additive                 | 1.26E-08                   |
| 2                      | 76,334,435                                 | 76,755,188                              | <i>rs134705498</i>          | Additive<br>Dominant     | 9.19E-10<br>1.08E-09       |
| 2                      | 86,075,750                                 | 86,479,252                              | <i>rs133738177</i>          | Additive<br>Dominant     | 2.71E-23<br>2.71E-23       |
| 2                      | 98,041,003                                 | 98,468,702                              | <i>rs136360354</i>          | Dominant                 | 1.49E-08                   |
| 2                      | 123,224,834                                | 123,768,735                             | <i>rs41636509*</i>          | Additive<br>Recessive    | 4.16E-08<br>9.47E-12       |
| 2                      | 123,403,424                                | 123,947,527                             | <i>rs110886070*</i>         | Dominant                 | 1.11E-08                   |
| 2                      | 129,277,519                                | 129,876,162                             | <i>rs136809757*</i>         | Additive<br>Dominant     | 1.28E-11<br>1.28E-11       |

|   |             |             |                     |                       |                      |
|---|-------------|-------------|---------------------|-----------------------|----------------------|
| 3 | 11,494,736  | 11,612,564  | <i>rs110900677</i>  | Additive              | 1.63E-08             |
| 3 | 16,594,030  | 16,653,795  | <i>rs133063046</i>  | Dominant              | 6.79E-10             |
| 3 | 23,385,126  | 23,494,800  | <i>rs134056476</i>  | Additive<br>Dominant  | 6.56E-18<br>1.78E-18 |
| 3 | 26,320,263  | 26,436,103  | <i>rs109659431</i>  | Additive<br>Recessive | 8.85E-10<br>4.61E-10 |
| 3 | 31,645,740  | 31,800,315  | <i>rs43746101</i>   | Additive<br>Recessive | 7.84E-09<br>8.27E-12 |
| 3 | 54,398,276  | 54,575,757  | <i>rs110480314*</i> | Dominant              | 2.03E-11             |
| 3 | 72,002,117  | 72,296,340  | <i>rs29013285</i>   | Dominant              | 4.54E-10             |
| 3 | 76,838,701  | 77,163,315  | <i>rs136533238</i>  | Dominant              | 1.80E-10             |
| 3 | 97,093,984  | 97,680,312  | <i>rs41585055</i>   | Additive<br>Dominant  | 1.55E-11<br>2.93E-16 |
| 3 | 97,504,864  | 98,096,750  | <i>rs29024665</i>   | Dominant              | 6.41E-12             |
| 3 | 97,690,487  | 98,284,456  | <i>rs43360769</i>   | Recessive             | 5.45E-11             |
| 3 | 110,948,044 | 111,540,905 | <i>rs133945887</i>  | Recessive             | 1.33E-14             |
| 3 | 116,861,907 | 117,489,001 | <i>rs43371109</i>   | Additive<br>Dominant  | 3.17E-09<br>9.20E-13 |
| 4 | 4,788,623   | 4,700,972   | <i>rs136994488</i>  | Recessive             | 2.27E-08             |
| 4 | 9,919,989   | 9,772,807   | <i>rs137111726</i>  | Dominant              | 5.89E-09             |
| 4 | 37,056,340  | 37,235,676  | <i>rs133417267</i>  | Additive<br>Dominant  | 2.93E-13<br>2.93E-13 |
| 4 | 43,184,336  | 43,419,900  | <i>rs109009636</i>  | Recessive             | 2.25E-10             |
| 4 | 44,864,073  | 45,128,631  | <i>rs13665021</i>   | Dominant              | 1.81E-08             |
| 4 | 48,440,026  | 48,718,180  | <i>rs136800119*</i> | Additive<br>Dominant  | 1.43E-08<br>1.43E-08 |
| 4 | 55,979,237  | 55,988,253  | <i>rs132801901</i>  | Dominant              | 2.47E-11             |
| 4 | 60,044,804  | 60,433,843  | <i>rs133973179</i>  | Additive              | 7.97E-09             |
| 4 | 65,833,048  | 66,232,207  | <i>rs108957740</i>  | Dominant              | 6.22E-10             |
| 4 | 84,353,274  | 85,102,727  | <i>rs135837483*</i> | Additive              | 1.68E-08             |
| 4 | 92,464,322  | 93,277,289  | <i>rs109721084</i>  | Additive<br>Dominant  | 4.18E-11<br>3.75E-13 |
| 5 | 4,361,199   | 4,346,709   | <i>rs110152722*</i> | Additive<br>Dominant  | 1.43E-11<br>9.65E-12 |
| 5 | 12,616,464  | 12,688,864  | <i>rs136793667</i>  | Additive<br>Dominant  | 4.04E-12<br>1.28E-08 |
| 5 | 17,857,463  | 17,922,992  | <i>rs132637832</i>  | Additive<br>Dominant  | 2.23E-12<br>2.23E-12 |
| 5 | 21,290,477  | 21,357,397  | <i>rs137251811</i>  | Dominant              | 7.64E-10             |
| 5 | 28,061,170  | 28,218,085  | <i>rs135989081</i>  | Dominant              | 1.31E-10             |
| 5 | 28,774,907  | 28,939,485  | <i>rs134199916*</i> | Additive<br>Dominant  | 2.94E-12<br>2.94E-12 |
| 5 | 30,438,787  | 30,608,814  | <i>rs133335343*</i> | Additive<br>Dominant  | 1.60E-12<br>1.60E-12 |
| 5 | 36,663,436  | 36,860,611  | <i>rs136252597</i>  | Additive              | 1.01E-13             |

|   |             |             |                     |                       |                      |
|---|-------------|-------------|---------------------|-----------------------|----------------------|
|   |             |             |                     | Dominant              | 1.01E-13             |
| 5 | 40,344,343  | 40,576,651  | <i>rs43434026</i>   | Recessive             | 1.30E-08             |
| 5 | 45,981,588  | 46,183,975  | <i>rs136476902</i>  | Dominant              | 4.50E-08             |
| 5 | 58,573,797  | 58,906,988  | <i>rs137278465*</i> | Recessive             | 4.96E-08             |
| 5 | 59,146,023  | 59,503,184  | <i>rs133515825*</i> | Dominant              | 6.64E-09             |
| 5 | 59,553,709  | 59,905,836  | <i>rs137261569*</i> | Additive<br>Dominant  | 1.82E-25<br>1.82E-25 |
| 5 | 102,233,026 | 102,693,737 | <i>rs109344731*</i> | Dominant              | 7.77E-14             |
| 5 | 110,537,227 | 111,051,266 | <i>rs136545177*</i> | Recessive             | 9.29E-11             |
| 5 | 119,424,101 | 121,044,113 | <i>rs133051543*</i> | Recessive             | 3.20E-11             |
| 6 | 7,448,715   | 8,628,487   | <i>rs136663821</i>  | Dominant              | 1.24E-10             |
| 6 | 10,139,671  | 11,301,952  | <i>rs29019244</i>   | Dominant              | 9.31E-09             |
| 6 | 10,734,724  | 11,898,659  | <i>rs137187491</i>  | Additive<br>Dominant  | 4.73E-10<br>4.73E-10 |
| 6 | 17,693,932  | 18,946,287  | <i>rs43456078</i>   | Recessive             | 3.08E-09             |
| 6 | 30,369,047  | 31,792,754  | <i>rs135006577</i>  | Additive<br>Dominant  | 3.83E-24<br>3.83E-24 |
| 6 | 37,013,919  | 38,447,022  | <i>rs109381958*</i> | Additive<br>Dominant  | 4.31E-30<br>4.31E-30 |
| 6 | 45,218,126  | 46,763,699  | <i>rs137502911</i>  | Recessive             | 1.43E-09             |
| 6 | 53,086,414  | 54,689,211  | <i>rs42762416</i>   | Additive<br>Dominant  | 6.94E-15<br>6.94E-15 |
| 6 | 73,255,115  | 74,910,779  | <i>rs110648584</i>  | Additive<br>Dominant  | 3.35E-09<br>1.79E-10 |
| 6 | 79,147,024  | 80,854,287  | <i>rs109934822*</i> | Additive<br>Recessive | 1.72E-09<br>6.06E-12 |
| 6 | 84,673,257  | 86,399,380  | <i>rs132748387</i>  | Additive<br>Dominant  | 8.86E-09<br>8.86E-09 |
| 6 | 91,512,574  | 93,263,835  | <i>rs43476570</i>   | Dominant              | 3.51E-08             |
| 6 | 91,908,296  | 93,660,111  | <i>rs132854961</i>  | Recessive             | 1.56E-14             |
| 6 | 98,510,667  | 100,293,854 | <i>rs109245852</i>  | Recessive             | 1.28E-10             |
| 6 | 98,949,730  | 100,733,028 | <i>rs43488004</i>   | Additive<br>Dominant  | 5.57E-17<br>3.38E-21 |
| 6 | 100,626,371 | 102,407,680 | <i>rs134284115</i>  | Recessive             | 6.91E-10             |
| 7 | 1,149,677   | 1,053,454   | <i>rs133295796</i>  | Additive<br>Dominant  | 8.66E-25<br>8.66E-25 |
| 7 | 7,183,086   | 8,207,142   | <i>rs134787463*</i> | Dominant              | 2.54E-09             |
| 7 | 7,199,859   | 8,223,914   | <i>rs133396251*</i> | Additive<br>Dominant  | 4.97E-11<br>9.22E-13 |
| 7 | 36,068,330  | 37,422,936  | <i>rs132666128</i>  | Recessive             | 3.10E-09             |
| 7 | 43,772,010  | 45,391,177  | <i>rs110014023*</i> | Recessive             | 4.65E-10             |
| 7 | 78,348,022  | 80,634,324  | <i>rs132636869</i>  | Dominant              | 1.76E-11             |
| 7 | 79,449,880  | 81,737,860  | <i>rs133675138</i>  | Additive              | 1.62E-08             |
| 7 | 96,416,881  | 98,828,347  | <i>rs137216406</i>  | Dominant              | 3.80E-10             |
| 7 | 97,540,689  | 99,952,417  | <i>rs110327822</i>  | Additive              | 7.30E-09             |

|    |             |             |                     |                      |                      |
|----|-------------|-------------|---------------------|----------------------|----------------------|
|    |             |             |                     | Dominant             | 9.48E-14             |
| 8  | 20,675,446  | 20,685,523  | <i>rs109551298</i>  | Recessive            | 1.16E-10             |
| 8  | 20,721,025  | 20,731,035  | <i>rs43539285</i>   | Additive<br>Dominant | 3.16E-13<br>6.84E-13 |
| 8  | 24,555,128  | 24,520,365  | <i>rs134954592</i>  | Dominant             | 1.14E-08             |
| 8  | 29,565,411  | 29,615,889  | <i>rs134405734</i>  | Additive<br>Dominant | 1.42E-36<br>1.42E-36 |
| 8  | 47,118,716  | 47,416,086  | <i>rs133499631</i>  | Additive<br>Dominant | 5.03E-09<br>5.03E-09 |
| 8  | 49,974,619  | 50,283,891  | <i>rs109254920</i>  | Dominant             | 1.45E-08             |
| 8  | 50,255,926  | 50,571,006  | <i>rs134144724</i>  | Additive<br>Dominant | 9.92E-10<br>9.92E-10 |
| 8  | 58,921,513  | 59,331,066  | <i>rs136685338</i>  | Additive<br>Dominant | 7.61E-10<br>1.77E-10 |
| 8  | 65,837,664  | 66,316,372  | <i>rs133697170</i>  | Additive<br>Dominant | 1.51E-19<br>1.51E-19 |
| 8  | 76,695,824  | 78,049,107  | <i>rs41859655</i>   | Dominant             | 6.31E-11             |
| 8  | 77,981,766  | 79,362,912  | <i>rs134979587</i>  | Additive<br>Dominant | 1.68E-14<br>1.68E-14 |
| 8  | 92,765,998  | 94,405,438  | <i>rs43569214</i>   | Additive             | 1.64E-08             |
| 8  | 101,333,339 | 103,040,511 | <i>rs110198832</i>  | Recessive            | 2.48E-08             |
| 8  | 102,293,921 | 103,998,687 | <i>rs42359237</i>   | Dominant             | 1.12E-08             |
| 8  | 111,550,769 | UK          | <i>rs134584163</i>  | Additive<br>Dominant | 2.93E-19<br>2.93E-19 |
| 9  | 6,538,240   | 6,661,699   | <i>rs110968046*</i> | Recessive            | 3.30E-09             |
| 9  | 43,839,708  | 44,351,018  | <i>rs110310103</i>  | Additive<br>Dominant | 3.26E-10<br>4.54E-12 |
| 9  | 64,893,414  | 65,812,782  | <i>rs110885320</i>  | Recessive            | 1.83E-08             |
| 9  | 74,687,743  | 75,695,000  | <i>rs134083077</i>  | Additive<br>Dominant | 1.36E-17<br>1.36E-17 |
| 9  | 83,719,602  | 84,824,332  | <i>rs109177941</i>  | Dominant             | 2.66E-09             |
| 9  | 86,166,629  | 87,314,566  | <i>rs133550131</i>  | Additive<br>Dominant | 2.71E-08<br>4.81E-09 |
| 9  | 86,827,054  | 87,975,311  | <i>rs134079040*</i> | Additive<br>Dominant | 1.95E-11<br>1.95E-11 |
| 9  | 91,931,462  | 93,306,447  | <i>rs134964346</i>  | Dominant             | 3.64E-08             |
| 9  | 97,468,572  | 98,925,099  | <i>rs135920187</i>  | Recessive            | 4.20E-08             |
| 10 | 34,950,052  | 35,050,522  | <i>rs110393438</i>  | Dominant             | 7.06E-09             |
| 10 | 43,101,892  | 43,145,489  | <i>rs109533748</i>  | Additive<br>Dominant | 6.04E-11<br>6.04E-11 |
| 10 | 46,666,450  | 46,723,072  | <i>rs133481026</i>  | Additive<br>Dominant | 4.99E-09<br>4.99E-09 |
| 10 | 62,992,388  | 63,217,046  | <i>rs133388647</i>  | Recessive            | 1.47E-12             |
| 10 | 67,250,158  | 67,481,157  | <i>rs29026382</i>   | Recessive            | 4.10E-13             |
| 10 | 76,396,374  | 76,708,701  | <i>rs132793686</i>  | Dominant             | 2.05E-09             |

|    |             |             |                     |                       |                      |
|----|-------------|-------------|---------------------|-----------------------|----------------------|
| 10 | 80,522,688  | 80,873,088  | <i>rs110456535</i>  | Dominant              | 2.02E-11             |
| 10 | 87,401,016  | 88,409,131  | <i>rs43026102</i>   | Recessive             | 1.49E-08             |
| 10 | 91,225,759  | 92,349,953  | <i>rs134880886</i>  | Additive<br>Dominant  | 4.04E-09<br>2.30E-11 |
| 11 | 2,150,214   | 2,115,725   | <i>rs110303601</i>  | Dominant              | 1.51E-09             |
| 11 | 13,613,210  | 13,625,673  | <i>rs43661407</i>   | Recessive             | 3.39E-12             |
| 11 | 13,798,421  | 13,809,204  | <i>rs110462022</i>  | Dominant              | 8.46E-09             |
| 11 | 16,856,558  | 16,878,438  | <i>rs109265815</i>  | Dominant              | 1.48E-08             |
| 11 | 22,761,817  | 22,794,712  | <i>rs109465638</i>  | Recessive             | 2.50E-08             |
| 11 | 27,428,692  | 27,263,096  | <i>rs137239134</i>  | Recessive             | 4.28E-09             |
| 11 | 44,861,152  | 44,723,154  | <i>rs136865423*</i> | Recessive             | 6.99E-09             |
| 11 | 48,485,035  | 48,355,243  | <i>rs134197588</i>  | Recessive             | 6.84E-09             |
| 11 | 52,376,018  | 52,289,973  | <i>rs136569977</i>  | Dominant              | 4.30E-11             |
| 11 | 65,376,428  | 65,350,346  | <i>rs110844122</i>  | Dominant              | 1.01E-08             |
| 11 | 72,458,410  | 72,447,958  | <i>rs134695420</i>  | Additive<br>Dominant  | 3.93E-11<br>3.93E-11 |
| 11 | 77,409,930  | 77,475,988  | <i>rs109117330</i>  | Recessive             | 7.43E-10             |
| 11 | 81,737,489  | 81,885,400  | <i>rs133374668</i>  | Dominant              | 2.00E-09             |
| 11 | 86,434,490  | 86,400,864  | <i>rs110541854</i>  | Dominant              | 1.65E-08             |
| 11 | 92,127,718  | 92,107,430  | <i>rs110293128*</i> | Additive<br>Dominant  | 2.51E-08<br>2.89E-09 |
| 11 | 106,236,174 | 105,879,823 | <i>rs136006377</i>  | Additive<br>Dominant  | 2.48E-08<br>2.48E-08 |
| 12 | 3,950,729   | 3,902,971   | <i>rs42273278</i>   | Additive<br>Dominant  | 1.31E-10<br>1.31E-10 |
| 12 | 11,232,062  | 11,261,415  | <i>rs134036785</i>  | Additive<br>Recessive | 1.42E-09<br>1.85E-09 |
| 12 | 13,263,086  | 13,305,470  | <i>rs134850048</i>  | Dominant              | 1.26E-08             |
| 12 | 14,179,880  | 14,220,951  | <i>rs42421894</i>   | Dominant              | 7.32E-09             |
| 12 | 22,847,412  | 22,868,176  | <i>rs134779941</i>  | Dominant              | 5.35E-09             |
| 12 | 55,301,894  | 55,644,058  | <i>rs133586046</i>  | Recessive             | 4.50E-09             |
| 12 | 62,999,694  | 63,506,888  | <i>rs42401835*</i>  | Additive<br>Dominant  | 8.64E-14<br>8.64E-14 |
| 12 | 79,801,920  | 83,789,534  | <i>rs133844853</i>  | Dominant              | 7.16E-09             |
| 12 | 82,937,444  | 86,947,480  | <i>rs136060818</i>  | Dominant              | 1.62E-08             |
| 13 | 18,770,980  | 19,046,020  | <i>rs43010890</i>   | Recessive             | 5.38E-12             |
| 13 | 19,506,748  | 19,783,272  | <i>rs137476701</i>  | Dominant              | 1.78E-09             |
| 13 | 20,077,191  | 20,354,799  | <i>rs133469415</i>  | Additive<br>Dominant  | 6.14E-14<br>6.14E-14 |
| 13 | 29,397,730  | 29,684,250  | <i>rs110622330</i>  | Recessive             | 5.96E-11             |
| 13 | 29,776,357  | 30,062,520  | <i>rs461403756</i>  | Dominant              | 1.50E-13             |
| 13 | 38,719,394  | 39,028,678  | <i>rs110048014</i>  | Additive<br>Recessive | 1.37E-08<br>2.94E-10 |
| 13 | 38,961,497  | 39,272,508  | <i>rs43432233</i>   | Additive<br>Dominant  | 1.44E-08<br>2.06E-10 |

|    |            |            |                     |                       |                      |
|----|------------|------------|---------------------|-----------------------|----------------------|
| 13 | 53,570,673 | 54,043,428 | <i>rs133341033</i>  | Additive<br>Dominant  | 2.30E-25<br>2.30E-25 |
| 13 | 65,751,601 | 66,409,398 | <i>rs137078749</i>  | Additive<br>Dominant  | 1.38E-08<br>1.05E-08 |
| 14 | 5,977,676  | 7,007,670  | <i>rs137643258</i>  | Additive<br>Dominant  | 2.21E-12<br>2.21E-12 |
| 14 | 10,503,090 | 11,595,996 | <i>rs110963142</i>  | Additive<br>Dominant  | 1.79E-11<br>3.21E-08 |
| 14 | 10,920,697 | 12,011,754 | <i>rs109257200</i>  | Recessive             | 1.03E-08             |
| 14 | 17,427,116 | 19,026,221 | <i>rs137303686</i>  | Additive<br>Dominant  | 2.22E-22<br>2.22E-22 |
| 14 | 18,898,727 | 20,508,616 | <i>rs136484948</i>  | Dominant              | 3.71E-09             |
| 14 | 21,829,591 | 23,487,120 | <i>rs132681578</i>  | Dominant              | 3.64E-09             |
| 14 | 40,373,996 | 42,513,237 | <i>rs134327452</i>  | Additive<br>Dominant  | 1.39E-10<br>1.39E-10 |
| 14 | 47,383,242 | 49,543,299 | <i>rs132969548</i>  | Additive<br>Dominant  | 5.97E-17<br>5.97E-17 |
| 14 | 48,129,989 | 50,291,072 | <i>rs41913814</i>   | Recessive             | 1.90E-13             |
| 14 | 61,186,844 | 63,368,132 | <i>rs135824064</i>  | Additive<br>Dominant  | 3.88E-13<br>3.88E-13 |
| 14 | 62,903,956 | 65,091,197 | <i>rs108988798</i>  | Dominant              | 2.31E-08             |
| 14 | 63,272,692 | 65,461,577 | <i>rs136877882</i>  | Additive<br>Dominant  | 1.48E-09<br>1.48E-09 |
| 14 | 68,298,233 | 70,639,444 | <i>rs109864366</i>  | Dominant              | 7.27E-10             |
| 14 | 69,468,403 | 71,800,181 | <i>rs110724532</i>  | Dominant              | 4.86E-08             |
| 15 | 3,892,610  | 4,122,586  | <i>rs43092354</i>   | Dominant              | 1.92E-08             |
| 15 | 50,236,587 | 20,566,255 | <i>rs133898251</i>  | Dominant              | 3.64E-09             |
| 15 | 26,169,835 | 26,550,309 | <i>rs135503279</i>  | Additive<br>Dominant  | 6.51E-09<br>2.55E-12 |
| 15 | 27,686,834 | 28,115,478 | <i>rs109754402</i>  | Dominant              | 2.64E-08             |
| 15 | 41,454,122 | 42,017,199 | <i>rs110688968</i>  | Recessive             | 2.56E-08             |
| 15 | 47,085,829 | 47,683,465 | <i>rs42709871</i>   | Recessive             | 4.16E-08             |
| 15 | 49,145,364 | 49,957,957 | <i>rs42582930*</i>  | Recessive             | 5.77E-09             |
| 15 | 51,694,817 | 52,472,254 | <i>rs109018952</i>  | Recessive             | 1.69E-08             |
| 15 | 60,599,380 | 61,384,207 | <i>rs137823813</i>  | Additive<br>Dominant  | 2.07E-13<br>2.07E-13 |
| 15 | 67,918,952 | 68,743,862 | <i>rs42409285</i>   | Additive<br>Dominant  | 1.07E-14<br>1.07E-14 |
| 16 | 591,660    | 387,363    | <i>rs133778157</i>  | Additive<br>Dominant  | 2.99E-33<br>2.99E-33 |
| 16 | 2,652,952  | 2,481,284  | <i>rs136166247</i>  | Additive<br>Dominant  | 1.50E-08<br>1.50E-08 |
| 16 | 9,739,230  | 10,340,087 | <i>rs137501137*</i> | Additive<br>Recessive | 1.60E-10<br>5.27E-14 |
| 16 | 28,569,825 | 29,273,187 | <i>rs133320887</i>  | Dominant              | 9.97E-09             |

|    |            |            |                     |                       |                      |
|----|------------|------------|---------------------|-----------------------|----------------------|
| 16 | 30,188,773 | 30,938,347 | <i>rs42397367*</i>  | Recessive             | 1.18E-09             |
| 16 | 47,786,357 | 48,632,055 | <i>rs108984875</i>  | Dominant              | 3.89E-09             |
| 16 | 52,005,041 | 53,254,900 | <i>rs137785107</i>  | Additive<br>Dominant  | 1.19E-24<br>1.19E-24 |
| 16 | 54,652,215 | 56,109,427 | <i>rs136639933</i>  | Dominant              | 2.60E-09             |
| 16 | 64,778,352 | 66,254,121 | <i>rs136982487</i>  | Dominant              | 1.33E-09             |
| 17 | 26,036     | 3,910      | <i>rs132751093</i>  | Recessive             | 1.49E-09             |
| 17 | 517,824    | 489,394    | <i>rs41834034</i>   | Recessive             | 2.41E-14             |
| 17 | 3,864,048  | 3,859,156  | <i>rs41835767</i>   | Dominant              | 1.91E-08             |
| 17 | 4,547,071  | 4,548,256  | <i>rs110253313</i>  | Dominant              | 1.66E-08             |
| 17 | 13,969,248 | 14,147,211 | <i>rs135563413*</i> | Dominant              | 8.79E-10             |
| 17 | 39,507,917 | 40,358,711 | <i>rs110041332</i>  | Dominant              | 1.59E-08             |
| 17 | 41,252,369 | 42,216,582 | <i>rs137522961</i>  | Additive<br>Dominant  | 9.85E-09<br>9.85E-09 |
| 17 | 52,991,529 | 55,237,847 | <i>rs136539859</i>  | Additive<br>Dominant  | 1.49E-09<br>1.49E-09 |
| 17 | 55,656,970 | 57,905,713 | <i>rs41846781</i>   | Dominant              | 5.31E-12             |
| 17 | 61,351,505 | 63,626,189 | <i>rs29022475</i>   | Recessive             | 9.42E-10             |
| 17 | 72,726,732 | 74,741,425 | <i>rs135830763*</i> | Recessive             | 1.72E-08             |
| 17 | 72,930,491 | 74,944,074 | <i>rs133921184*</i> | Additive<br>Dominant  | 3.35E-37<br>2.93E-37 |
| 17 | 73,036,168 | 75,073,522 | <i>rs134240868</i>  | Recessive             | 1.43E-09             |
| 18 | 8,895,233  | 8,946,233  | <i>rs109049561</i>  | Dominant              | 3.96E-09             |
| 18 | 21,851,964 | 21,929,721 | <i>rs41872094</i>   | Additive<br>Dominant  | 1.22E-08<br>3.85E-10 |
| 18 | 26,260,207 | 26,345,070 | <i>rs132695972</i>  | Recessive             | 2.32E-09             |
| 18 | 30,698,212 | 30,802,833 | <i>rs136230873</i>  | Additive<br>Dominant  | 4.77E-10<br>4.77E-10 |
| 18 | 51,761,768 | 52,098,021 | <i>rs135795435</i>  | Additive<br>Dominant  | 1.29E-08<br>1.51E-12 |
| 18 | 60,746,221 | 61,024,520 | <i>rs110912084*</i> | Recessive             | 2.27E-09             |
| 18 | 64,774,970 | 64,948,024 | <i>rs132853891*</i> | Additive<br>Dominant  | 2.66E-08<br>2.66E-08 |
| 19 | 7,351,312  | 7,561,956  | <i>rs109543948</i>  | Dominant              | 1.49E-09             |
| 19 | 8,798,124  | 9,030,243  | <i>rs55617305</i>   | Additive<br>Dominant  | 1.46E-11<br>4.79E-16 |
| 19 | 23,526,814 | 24,125,771 | <i>rs137270020</i>  | Additive<br>Dominant  | 1.29E-12<br>1.29E-12 |
| 19 | 52,260,661 | 52,878,628 | <i>rs42536038*</i>  | Recessive             | 1.62E-08             |
| 19 | 59,314,995 | 59,887,086 | <i>rs136759305</i>  | Recessive             | 3.92E-10             |
| 20 | 2,092,588  | 1,993,220  | <i>rs136404429</i>  | Additive<br>Dominant  | 5.97E-11<br>5.97E-11 |
| 20 | 12,227,013 | 12,157,403 | <i>rs42861517</i>   | Dominant              | 2.53E-10             |
| 20 | 23,863,171 | 23,886,196 | <i>rs41663374</i>   | Additive<br>Recessive | 1.75E-08<br>9.41E-17 |

|    |            |            |                     |                       |                      |
|----|------------|------------|---------------------|-----------------------|----------------------|
| 20 | 27,079,454 | 27,092,889 | <i>rs109295451*</i> | Additive<br>Dominant  | 3.64E-10<br>1.51E-11 |
| 20 | 32,844,020 | 32,857,681 | <i>rs41570034</i>   | Additive<br>Dominant  | 4.92E-08<br>7.25E-09 |
| 20 | 43,870,356 | 43,878,009 | <i>rs133025074</i>  | Dominant              | 1.63E-09             |
| 20 | 56,858,708 | 56,934,353 | <i>rs135510586</i>  | Recessive             | 5.60E-10             |
| 20 | 67,167,923 | 67,303,443 | <i>rs41977686</i>   | Dominant              | 1.65E-08             |
| 21 | 19,865,163 | 20,266,091 | <i>rs135570367*</i> | Recessive             | 3.47E-08             |
| 22 | 8,387,721  | 8,458,003  | <i>rs135197396</i>  | Additive<br>Dominant  | 1.42E-27<br>1.42E-27 |
| 22 | 14,276,238 | 14,317,937 | <i>rs41999540</i>   | Dominant              | 3.55E-08             |
| 22 | 16,592,558 | 16,637,720 | <i>rs110036873</i>  | Recessive             | 6.06E-09             |
| 22 | 27,624,256 | 27,741,860 | <i>rs110812060</i>  | Recessive             | 1.48E-08             |
| 22 | 28,163,493 | 28,283,571 | <i>rs110283240</i>  | Recessive             | 2.29E-12             |
| 22 | 28,460,191 | 28,580,713 | <i>rs110399563</i>  | Additive<br>Dominant  | 4.99E-17<br>4.99E-17 |
| 22 | 28,727,485 | 28,846,011 | <i>rs136708885</i>  | Additive<br>Dominant  | 3.55E-09<br>3.94E-15 |
| 22 | 35,257,886 | 35,372,657 | <i>rs109203878</i>  | Additive<br>Dominant  | 2.00E-15<br>2.82E-16 |
| 22 | 38,471,613 | 38,612,397 | <i>rs109985339</i>  | Dominant              | 5.72E-09             |
| 22 | 52,754,203 | 53,319,295 | <i>rs135350436*</i> | Additive<br>Dominant  | 4.47E-08<br>4.47E-08 |
| 22 | 54,996,329 | 55,634,857 | <i>rs109725058</i>  | Recessive             | 2.62E-13             |
| 23 | 4,277,670  | 4,197,354  | <i>rs110037746*</i> | Recessive             | 1.04E-12             |
| 23 | 29,137,447 | 28,938,184 | <i>rs41622011</i>   | Additive<br>Recessive | 4.99E-11<br>2.17E-13 |
| 23 | 29,706,398 | 29,507,533 | <i>rs110828627</i>  | Dominant              | 1.48E-11             |
| 23 | 30,716,573 | 30,467,678 | <i>rs109556465*</i> | Additive<br>Recessive | 3.65E-08<br>8.96E-10 |
| 23 | 35,342,022 | 35,114,464 | <i>rs110684599</i>  | Dominant              | 2.60E-09             |
| 24 | 5,760,130  | 6,039,397  | <i>rs43146766*</i>  | Dominant              | 1.75E-08             |
| 24 | 24,898,563 | 25,207,516 | <i>rs137162280</i>  | Dominant              | 4.10E-08             |
| 24 | 26,662,068 | 26,978,274 | <i>rs134272624</i>  | Recessive             | 1.89E-09             |
| 24 | 39,687,343 | 40,118,364 | <i>rs110436513</i>  | Dominant              | 1.50E-08             |
| 25 | 19,679,050 | 19,891,605 | <i>rs42057006</i>   | Recessive             | 2.41E-08             |
| 26 | 1,361,088  | 1,361,105  | <i>rs132818386</i>  | Additive<br>Dominant  | 2.03E-08<br>2.03E-08 |
| 26 | 7,685,740  | 7,709,388  | <i>rs133146678</i>  | Dominant              | 1.11E-13             |
| 26 | 14,468,328 | 14,512,486 | <i>rs109678718</i>  | Dominant              | 2.50E-12             |
| 26 | 19,200,857 | 19,065,913 | <i>rs137211719</i>  | Additive<br>Dominant  | 4.86E-08<br>6.67E-09 |
| 26 | 28,538,139 | 28,800,534 | <i>rs42434955</i>   | Additive<br>Dominant  | 6.95E-09<br>1.99E-09 |
| 26 | 31,462,025 | 31,743,621 | <i>rs110951772</i>  | Additive              | 8.62E-10             |



|    |             |             |                     |                      |                      |
|----|-------------|-------------|---------------------|----------------------|----------------------|
|    |             |             |                     | Dominant             | 2.76E-10             |
| 26 | 31,582,567  | 31,864,154  | <i>rs133291115</i>  | Additive<br>Dominant | 7.03E-09<br>7.03E-09 |
| 26 | 32,979,983  | 33,257,060  | <i>rs42095933*</i>  | Additive<br>Dominant | 4.03E-08<br>3.52E-13 |
| 26 | 40,532,093  | 40,905,403  | <i>rs42455375</i>   | Dominant             | 2.48E-08             |
| 27 | 19,704,072  | 18,769,799  | <i>rs134936745</i>  | Additive<br>Dominant | 8.46E-09<br>4.09E-09 |
| 27 | 19,979,775  | 19,045,703  | <i>rs42116995</i>   | Recessive            | 2.18E-12             |
| 27 | 22,017,244  | 21,083,026  | <i>rs110750240</i>  | Dominant             | 5.43E-11             |
| 27 | 22,307,598  | 21,375,791  | <i>rs132728892</i>  | Additive<br>Dominant | 5.35E-12<br>5.35E-12 |
| 27 | 35,301,572  | 34,962,799  | <i>rs135769021*</i> | Additive<br>Dominant | 2.68E-10<br>2.68E-10 |
| 27 | 38,840,767  | 38,687,713  | <i>rs137177737</i>  | Dominant             | 1.06E-09             |
| 28 | 27,627,548  | 27,785,987  | <i>rs109367560</i>  | Dominant             | 1.47E-09             |
| 28 | 29,427,232  | 29,592,323  | <i>rs136467650</i>  | Additive<br>Dominant | 4.14E-08<br>4.14E-08 |
| 29 | 7,809,273   | 7,868,143   | <i>rs109712075</i>  | Additive<br>Dominant | 2.29E-13<br>4.11E-24 |
| 29 | 13,416,477  | 13,492,098  | <i>rs110880437</i>  | Dominant             | 7.73E-10             |
| 29 | 19,113,506  | 19,324,457  | <i>rs42169076*</i>  | Additive             | 9.25E-10             |
| 29 | 25,693,112  | 25,942,470  | <i>rs136096547</i>  | Additive<br>Dominant | 2.24E-08<br>2.24E-08 |
| 29 | 27,237,483  | 27,614,787  | <i>rs42784046*</i>  | Dominant             | 4.63E-08             |
| 29 | 27,454,921  | 27,820,784  | <i>rs43170197*</i>  | Additive<br>Dominant | 9.54E-10<br>8.45E-13 |
| 29 | 29,747,595  | 30,121,059  | <i>rs109392783</i>  | Dominant             | 1.75E-14             |
| 29 | 37,919,393  | 38,495,464  | <i>rs134114922*</i> | Dominant             | 9.22E-10             |
| 29 | 39,677,851  | 40,370,794  | <i>rs42189563*</i>  | Additive<br>Dominant | 8.92E-10<br>3.99E-13 |
| X  | 7,511,700   | 7,123,971   | <i>rs109930145</i>  | Dominant             | 2.29E-10             |
| X  | 15,770,097  | 15,668,542  | <i>rs132900305*</i> | Additive<br>Dominant | 9.85E-10<br>1.07E-10 |
| X  | 16,809,410  | 16,766,595  | <i>rs134765721</i>  | Dominant             | 1.68E-09             |
| X  | 52,683,020  | 58,003,830  | <i>rs137585994</i>  | Additive<br>Dominant | 1.67E-17<br>1.67E-17 |
| X  | 76,226,723  | 81,257,899  | <i>rs135276595</i>  | Recessive            | 2.38E-12             |
| X  | 85,254,844  | 90,518,686  | <i>rs134541035*</i> | Dominant             | 6.73E-09             |
| X  | 132,155,696 | 139,778,460 | <i>rs137830144</i>  | Additive<br>Dominant | 8.09E-09<br>8.09E-09 |

<sup>1</sup>Chromosome location of the locus; UK refers to an unassigned or unknown chromosomal location.

<sup>2</sup>Single nucleotide polymorphism (SNP) location as measured by numbered nucleotides in reference to the ARS 1.2 genome assembly

([https://www.animalgenome.org/repository/cattle/UMC\\_bovine\\_coordinates/](https://www.animalgenome.org/repository/cattle/UMC_bovine_coordinates/); accessed 19 September 2018).

<sup>3</sup>SNP location as measured by numbered nucleotides in reference to the UMD 3.1 genome assembly (<http://bovinegenome.org/?q=node/61>; accessed 2 April 2018); UK refers to an unassigned or unknown chromosomal location. If the SNP changed chromosomes between build this is noted before the bp position.

<sup>4</sup>The most significant SNP in the locus associated with cow conception rate as identified by *rs* number which is a reference number assigned to markers submitted to the National Center for Biotechnology Information SNP database (<https://www.ncbi.nlm.nih.gov/projects/SNP/>; accessed 2 April 2018).

<sup>5</sup>SNP located within previously identified copy number variations (CNVs) are denoted with an \*.

<sup>6</sup>Genome-wide association model.

<sup>7</sup>Significance (*P*-value) of the most significant SNP associated with cow conception rate.

**Table S2.** Loci associated with conception rate at first breeding containing transcription factor binding sites.

| <b>SNP ID<sup>1</sup></b> | <b>BTA:<br/>position<sup>2</sup></b> | <b>Transcription<br/>Factor(s)<sup>3</sup></b> | <b>Species<sup>4</sup></b> | <b>Binding Site<sup>5</sup></b> | <b>RE<br/>Query<sup>6</sup></b> |
|---------------------------|--------------------------------------|------------------------------------------------|----------------------------|---------------------------------|---------------------------------|
| <i>rs132895573</i>        | 1: 36,337                            | DBP                                            | rat                        | ATGT[G/A]CT                     | 0.0076                          |
| <i>rs136034629</i>        | 1: 16,670,513                        | Oct-B1                                         | human                      | ATGCAAA[C/T]                    | 0.00124                         |
|                           |                                      | POU2F2B                                        | human,<br>rat              | ATGCAAA[C/T]                    | 0.00124                         |
| <i>rs137394358</i>        | 1: 73,273,238                        | NF-1/L                                         | rat                        | TGGC[C/A]                       | 0.0039                          |
| <i>rs137156811</i>        | 1: 99,879,710                        | C/EBP $\alpha$                                 | human                      | GAG[T/C]AA                      | 0.00834                         |
| <i>rs42215584</i>         | 1: 113,931,474                       | NF-1/L                                         | rat                        | T[A/G]GCA                       | 0.00976                         |
| <i>rs135238817</i>        | 1: 128,427,500                       | PR B                                           | human                      | CACT[G/T]TT                     | 0.00686                         |
|                           |                                      | PR A                                           | human                      | CACT[G/T]TT                     | 0.00686                         |
|                           |                                      | IRF-2                                          | human                      | TCACT[G/T]                      | 0.01609                         |
| <i>rs43278206</i>         | 1: 139,950,787                       | HOXD9                                          | human,<br>mouse            | AAATT[G/T]TATT                  | 0.02278                         |
|                           |                                      | HOXD10                                         | human,<br>mouse            | AAATT[G/T]TATT                  | 0.02278                         |
| <i>rs108949806</i>        | 2: 4,883,261                         | NF-1/L                                         | rat                        | T[A/G]GCA                       | 0.02631                         |
| <i>rs137280033</i>        | 2: 13,518,945                        | NF-1/L                                         | rat                        | [T/C]GGCA                       | 0.02058                         |
| <i>rs110717447</i>        | 2: 33,688,017                        | STAT4                                          | human                      | [G/A]GAAAT                      | 0.01064                         |
| <i>rs42534341</i>         | 2: 53,552,010                        | c-Ets-2                                        | mouse                      | AGGAAT[G/T]C                    | 0.00018                         |
|                           |                                      | STAT4                                          | human                      | GGAAA[G/T]                      | 0.00454                         |
|                           |                                      | NF-1/L                                         | rat                        | [G/T]GCCA                       | 0.02577                         |
|                           |                                      | PEA3                                           | mouse                      | GGAAA[G/T]GC                    | 0.00345                         |
| <i>rs41636509</i>         | 2: 123,768,735                       | Nrf2:MafK                                      | rat                        | TCAGAA[T/C]                     | 0.00659                         |
|                           |                                      | POU2F1                                         | rat                        | AA[T/C]AAG                      | 0.02995                         |
| <i>rs136809757</i>        | 2: 129,876,162                       | C/EBP $\alpha$                                 | human                      | T[T/C]GCTC                      | 0.00435                         |
| <i>rs133063046</i>        | 3: 16,653,795                        | NF-1/L                                         | rat                        | TG[G/A]CA                       | 0.02808                         |
| <i>rs136994488</i>        | 4: 4,700,972                         | DBP                                            | rat                        | AG[C/A]AAAT                     | 0.01189                         |
| <i>rs137111726</i>        | 4: 9,772,807                         | NF-1/L                                         | rat                        | TG[G/T]CA                       | 0.02763                         |
| <i>rs136800119</i>        | 4: 48,718,180                        | c-Ets-2                                        | human                      | TT[T/C]CTC                      | 0.01082                         |
| <i>rs132637832</i>        | 5: 17,922,992                        | SXR:RXR- $\alpha$                              | human                      | T[C/T]TGA ACTT                  | 0.00061                         |
|                           |                                      | Nrf2:MafK                                      | rat                        | TTT[C/T]TGA                     | 0.01379                         |
| <i>rs137251811</i>        | 5: 21,357,397                        | HNF-3 $\alpha$                                 | rat                        | TGTTT[G/T]TT                    | 0.04189                         |
|                           |                                      | HNF-3 $\beta$                                  | rat                        | TGTTT[G/T]TT                    | 0.04189                         |
| <i>rs135989081</i>        | 5: 28,218,085                        | IRF-2                                          | human                      | TCACT[T/G]                      | 0.01048                         |
|                           |                                      | PR B                                           | human                      | CACT[T/G]TT                     | 0.00759                         |
|                           |                                      | PR A                                           | human                      | CACT[T/G]TT                     | 0.00759                         |
| <i>rs134199916</i>        | 5: 28,939,485                        | NF-AT1                                         | mouse                      | ATTTTC[C/T]                     | 0.00429                         |
|                           |                                      | AR                                             | human                      | TC[C/T]GTTC                     | 0.00204                         |
| <i>rs133051543</i>        | 5: 121,044,113                       | c-Ets-2                                        | mouse                      | TC[A/C]TTTCCT                   | 0.00071                         |
|                           |                                      | POU2F1                                         | rat                        | CTC[A/C]TT                      | 0.01899                         |
|                           |                                      | PEA3                                           | mouse                      | TC[A/C]TTTCC                    | 0.02111                         |
|                           |                                      | STAT4                                          | human                      | [A/C]TTTCC                      | 0.00873                         |

|                    |                    |                 |       |                |         |
|--------------------|--------------------|-----------------|-------|----------------|---------|
| <i>rs43456078</i>  | 6: 18,946,287      | Nrf2:MafK       | rat   | TCAGC[C/A]T    | 0.00451 |
| <i>rs135006577</i> | 6: 31,792,754      | Nrf2:MafK       | rat   | TTG[C/T]TGA    | 0.01135 |
| <i>rs109934822</i> | 6: 80,854,287      | STAT4           | human | [G/A]GAAAT     | 0.01355 |
| <i>rs134284115</i> | 6: 102,407,680     | T3R- $\alpha$   | rat   | TT[T/G]GGGTC   | 0.00073 |
| <i>rs133675138</i> | 7: 81,737,860      | Nkx2-1          | rat   | CTCAA[G/A]     | 0.00432 |
| <i>rs109551298</i> | 8: 20,685,523      | JunD            | mouse | CC[T/G]GAC     | 0.01236 |
| <i>rs109254920</i> | 8: 50,283,891      | HNF-3 $\alpha$  | rat   | A[C/A]CAAACA   | 0.00221 |
| <i>rs133697170</i> | 8: 66,316,372      | RXR- $\alpha$   | human | [A/G]GTTCA     | 0.00576 |
| <i>rs110310103</i> | 9: 44,351,018      | 2-Dec           | mouse | GCT[T/G]CATTTG | 0.00007 |
| <i>rs135920187</i> | 9: 98,925,099      | C/EBP $\beta$   | mouse | AAT[A/G]T      | 0.0335  |
| <i>rs109533748</i> | 10: 43,145,489     | PR B            | human | AACA[A/G]TA    | 0.00706 |
|                    |                    | PR A            | human | AACA[A/G]TA    | 0.00706 |
| <i>rs134880886</i> | 10: 92,349,953     | NF-AT1          | mouse | GGAA[G/A]AT    | 0.00704 |
|                    |                    | c-Ets-1         | human | CAGGAA[G/A]    | 0.00497 |
| <i>rs43661407</i>  | 11: 13,625,673     | NF-1/L          | rat   | TGGC[A/G]      | 0.02911 |
| <i>rs109265815</i> | 11: 16,878,438     | Fra-1           | rat   | [T/G]CGTCA     | 0.02218 |
| <i>rs109465638</i> | 11: 22,794,712     | HNF-3 $\beta$   | mouse | [A/C]AAAACA    | 0.01359 |
| <i>rs134197588</i> | 11: 48,355,243     | YY1             | mouse | A[T/G]GGAG     | 0.00602 |
| <i>rs110844122</i> | 11: 65,350,346     | PU.1            | mouse | GATGAGG[A/C]A  | 0.00131 |
|                    |                    | c-Ets-2         | human | GAGG[A/C]A     | 0.0134  |
| <i>rs134695420</i> | 11: 72,447,958     | C/EBP $\alpha$  | human | [A/G]AGCAA     | 0.00734 |
| <i>rs136006377</i> | 11:<br>105,879,823 | p53             | human | C[C/A]TGCCC    | 0.00315 |
| <i>rs42273278</i>  | 12: 3,902,971      | DBP             | rat   | AGCA[A/G]AC    | 0.01057 |
| <i>rs134036785</i> | 12: 11,261,415     | TBP             | human | TATAT[G/A]AA   | 0.01541 |
| <i>rs134779941</i> | 12: 22,868,176     | YY1             | human | AAATG[G/A]     | 0.01085 |
|                    |                    | NF-1/L          | rat   | TG[G/A]CA      | 0.01415 |
| <i>rs42401835</i>  | 12: 63,506,888     | NF-1/L          | rat   | TGC[C/T]A      | 0.01517 |
| <i>rs133844853</i> | 12: 83,789,534     | p53             | mouse | CTT[G/T]TCTG   | 0.00282 |
| <i>rs136060818</i> | 12: 86,947,480     | NF-X3           | human | CAGA[T/G]GAC   | 0.001   |
|                    |                    | XBP-1           | human | A[T/G]GACT     | 0.01129 |
| <i>rs110048014</i> | 13: 39,028,678     | Pax-5           | human | GGGCCT[G/T]    | 0.0364  |
| <i>rs136484948</i> | 14: 20,508,616     | HNF-3 $\beta$   | mouse | TGTTTT[G/T]    | 0.00589 |
| <i>rs42336979</i>  | 14: 60,164,356     | Sp1             | pig   | C[C/T]GCCC     | 0.02824 |
| <i>rs41741687</i>  | 14: 63,273,792     | AP-2 $\alpha$ A | human | [T/C]GGGG      | 0.00718 |
| <i>rs43092354</i>  | 15: 4,122,586      | Pax-5           | human | CCTGCC[T/C]    | 0.01994 |
| <i>rs133898251</i> | 15: 20,566,255     | RXR- $\alpha$   | human | TGA[C/A]CC     | 0.00402 |
| <i>rs135503279</i> | 15: 26,550,309     | HNF-3 $\beta$   | mouse | [C/A]AAAACA    | 0.01181 |
|                    |                    | C/EBP $\alpha$  | human | GAG[C/A]AA     | 0.03462 |
| <i>rs42709871</i>  | 15: 47,683,465     | Elk-1           | human | GAGGAA[G/T]    | 0.04061 |
| <i>rs137823813</i> | 15: 61,384,207     | POU1F1b         | rat   | AAAAT[C/T]AT   | 0.02491 |
|                    |                    | POU1F1c         | rat   | AAAAT[C/T]AT   | 0.02491 |
| <i>rs136166247</i> | 16: 2,481,284      | c-Ets-2         | human | TTC[T/C]TC     | 0.05109 |
| <i>rs137501137</i> | 16: 10,340,087     | NF-1            | mouse | ATTG[A/G]C     | 0.00565 |
|                    |                    | Cutl1           | mouse | ATTG[A/G]C     | 0.0125  |

|                    |                |                         |       |                |         |
|--------------------|----------------|-------------------------|-------|----------------|---------|
| <i>rs42397367</i>  | 16: 30,938,347 | Elk-1                   | human | CTTC[C/T]GC    | 0.0125  |
| <i>rs136982487</i> | 16: 66,254,121 | Sp1                     | pig   | [T/G]GGCGG     | 0.04067 |
| <i>rs41835767</i>  | 17: 3,859,156  | NF-1/L                  | rat   | TGG[T/C]A      | 0.02558 |
| <i>rs137522961</i> | 17: 42,216,582 | NF-AT1                  | mouse | ATTTT[T/C]C    | 0.002   |
|                    |                | TFIID                   | human | TTT[T/C]CAA    | 0.02093 |
| <i>rs29022475</i>  | 17: 63,626,189 | Fra-1                   | rat   | [T/G]GACAC     | 0.01452 |
| <i>rs132853891</i> | 18: 64,948,024 | STAT4                   | human | ATTTC[T/C]     | 0.01793 |
| <i>rs109543948</i> | 19: 7,561,956  | HNF-3 $\beta$           | mouse | T[T/G]TTTTG    | 0.01099 |
| <i>rs137270020</i> | 19: 24,125,771 | T3R- $\beta$            | rat   | [G/A]GTCACT    | 0.00102 |
| <i>rs42536038</i>  | 19: 52,878,628 | Pax-5                   | mouse | [T/G]CCACTCCTG | 0.00017 |
|                    |                | HNF-3 $\beta$           | mouse | TGTTTT[T/G]    | 0.00459 |
|                    |                | NF-1/L                  | rat   | T[T/G]CCA      | 0.02674 |
| <i>rs136759305</i> | 19: 59,887,086 | NF-1/L                  | rat   | T[G/T]CCA      | 0.02388 |
| <i>rs41570034</i>  | 20: 32,857,681 | STAT4                   | human | [G/T]GAAAT     | 0.01135 |
|                    | 21: 20,266,091 | NF-1                    | mouse | A[T/G]TGGC     | 0.00634 |
|                    |                | STAT4                   | human | GGAAA[T/G]     | 0.00874 |
|                    |                | Cutl1                   | mouse | A[T/G]TGGC     | 0.01684 |
| <i>rs135197396</i> | 22: 8,458,003  | JunD                    | mouse | GTCAA[T/G]     | 0.01308 |
| <i>rs110036873</i> | 22: 16,637,720 | f(alpha)-<br>f(epsilon) | mouse | T[C/T]CGGC     | 0.00646 |
| <i>rs109203878</i> | 22: 35,372,657 | JunD                    | mouse | [T/G]TCATG     | 0.00817 |
| <i>rs135350436</i> | 22: 53,319,295 | HNF-1C                  | human | AAAT[T/C]GC    | 0.00402 |
| <i>rs41622011</i>  | 23: 28,938,184 | T3R- $\beta$            | rat   | GGTCA[C/T]C    | 0.00209 |
| <i>rs133537811</i> | 24: 6,067,867  | NF-1/L                  | rat   | TGG[C/A]A      | 0.02058 |
| <i>rs110436513</i> | 24: 40,118,364 | HNF-3 $\beta$           | mouse | TGTTTT[G/T]    | 0.00743 |
| <i>rs133291115</i> | 26: 31,864,154 | TFIID                   | human | TTTTC[T/CA]    | 0.04343 |
| <i>rs110880437</i> | 29: 13,492,098 | HNF-1A                  | human | TAATT[G/A]T    | 0.04374 |
|                    |                | HNF-1B                  | human | TAATT[G/A]T    | 0.04374 |
|                    |                | HNF-1C                  | human | [G/A]TAATTT    | 0.01426 |
| <i>rs136096547</i> | 29: 25,942,470 | Pax-5                   | human | G[G/A]GCTTG    | 0.03234 |
| <i>rs134114922</i> | 29: 38,495,464 | LF-A1                   | human | CAG[G/T]GCA    | 0.00302 |
| <i>rs42916622</i>  | 29: 40,348,542 | NF-1/L                  | rat   | [G/T]GGCA      | 0.01871 |
| <i>rs137585994</i> | X: 58,003,830  | ARP-1                   | rat   | T[A/G]ACCTTTG  | 0.00042 |
|                    |                | JunD                    | mouse | CTT[A/G]AC     | 0.01397 |
| <i>rs137830144</i> | X: 139,778,460 | myogenin                | mouse | CCT[G/A]CTGC   | 0.00186 |
|                    |                | p53                     | mouse | CTTGCCT[G/A]   | 0.00469 |

<sup>1</sup>The most significant SNP in the locus as identified by *rs* number which is a reference number assigned to markers submitted to the National Center for Biotechnology Information SNP database (<https://www.ncbi.nlm.nih.gov/projects/SNP/>; accessed 2 April 2018).

<sup>2</sup>Single nucleotide polymorphism (SNP) location as measured by numbered nucleotides in reference to the UMD 3.1 genome assembly (<http://bovinegenome.org/?q=node/61>; accessed 2 April 2018).

<sup>3</sup>Gene symbol for the transcription factors whose binding sites spanned the locus.

<sup>4</sup>Species that the transcription factor binding site (TFBS) was identified.

<sup>5</sup>Binding site for the transcription factor, with the SNP mutation in brackets. Bolded alleles are associated with the TFBS.

<sup>6</sup>Random expectation (RE) query values as calculated by the PROMO  
([http://alggen.lsi.upc.es/cgi-bin/promo\\_v3/promo/promoinit.cgi?dirDB=TF\\_8.3](http://alggen.lsi.upc.es/cgi-bin/promo_v3/promo/promoinit.cgi?dirDB=TF_8.3); accessed 25  
July 2018).

**Table S3.** Loci associated with number of times bred to conception.

| <b>BTA<sup>1</sup></b> | <b>ARS 1.2<br/>BP Position<sup>2</sup></b> | <b>UMD 3.1<br/>Position<sup>3</sup></b> | <b>SNP ID<sup>4,5</sup></b> | <b>Model<sup>6</sup></b> | <b>P-Value<sup>7</sup></b> |
|------------------------|--------------------------------------------|-----------------------------------------|-----------------------------|--------------------------|----------------------------|
| UK                     | UK                                         | BTAX<br>20,919,326                      | <i>rs134105181</i>          | Dominant                 | 4.07E-08                   |
| 1                      | 33,136,647                                 | 32,700,496                              | <i>rs43226666*</i>          | Dominant                 | 9.31E-11                   |
| 1                      | 61,470,011                                 | 62,056,267                              | <i>rs42760220</i>           | Dominant                 | 2.54E-08                   |
| 1                      | 82,457,094                                 | 83,047,838                              | <i>rs109289667</i>          | Recessive                | 2.36E-08                   |
| 1                      | 99,081,740                                 | 99,879,710                              | <i>rs137156811</i>          | Additive<br>Dominant     | 2.39E-18<br>2.39E-18       |
| 1                      | 113,023,021                                | 113,931,474                             | <i>rs42215584</i>           | Additive<br>Dominant     | 6.74E-16<br>7.67E-17       |
| 1                      | 127,938,641                                | 128,938,068                             | <i>rs43265135*</i>          | Additive<br>Dominant     | 4.42E-10<br>1.14E-11       |
| 2                      | 4,950,986                                  | 4,883,261                               | <i>rs108949806</i>          | Dominant                 | 3.63E-09                   |
| 2                      | 86,075,750                                 | 86,479,252                              | <i>rs133738177</i>          | Additive<br>Dominant     | 1.01E-15<br>1.01E-15       |
| 2                      | 123,224,834                                | 123,768,735                             | <i>rs41636509*</i>          | Recessive                | 2.01E-08                   |
| 3                      | 23,385,126                                 | 23,494,800                              | <i>rs134056476</i>          | Additive<br>Dominant     | 2.10E-11<br>7.15E-12       |
| 3                      | 26,320,263                                 | 26,436,103                              | <i>rs109659431</i>          | Additive                 | 7.52E-09                   |
| 3                      | 31,645,740                                 | 31,800,315                              | <i>rs43746101</i>           | Recessive                | 1.93E-08                   |
| 3                      | 54,398,276                                 | 54,575,757                              | <i>rs110480314*</i>         | Additive<br>Dominant     | 1.54E-08<br>2.92E-11       |
| 3                      | 72,002,117                                 | 72,296,340                              | <i>rs29013285</i>           | Dominant                 | 2.49E-08                   |
| 3                      | 80,914,344                                 | 81,245,225                              | <i>rs43349445</i>           | Dominant                 | 2.97E-08                   |
| 3                      | 97,093,984                                 | 97,680,312                              | <i>rs41585055</i>           | Additive<br>Dominant     | 1.02E-08<br>1.55E-12       |
| 3                      | 97,504,864                                 | 98,096,750                              | <i>rs29024665</i>           | Dominant                 | 2.78E-09                   |
| 3                      | 97,690,487                                 | 98,284,456                              | <i>rs43360769</i>           | Recessive                | 4.42E-08                   |
| 3                      | 110,948,044                                | 111,540,905                             | <i>rs133945887</i>          | Recessive                | 7.25E-12                   |
| 4                      | 37,056,340                                 | 37,235,676                              | <i>rs133417267</i>          | Additive<br>Dominant     | 4.49E-10<br>4.49E-10       |
| 4                      | 43,184,336                                 | 43,419,900                              | <i>rs109009636</i>          | Recessive                | 1.80E-08                   |
| 4                      | 92,464,322                                 | 93,277,289                              | <i>rs109721084</i>          | Additive<br>Dominant     | 4.28E-10<br>1.33E-10       |
| 5                      | 4,361,199                                  | 4,346,709                               | <i>rs110152722*</i>         | Additive<br>Dominant     | 6.70E-09<br>4.07E-09       |
| 5                      | 12,616,464                                 | 12,688,864                              | <i>rs136793667</i>          | Additive                 | 1.01E-08                   |
| 5                      | 17,857,463                                 | 17,922,992                              | <i>rs132637832</i>          | Additive<br>Dominant     | 2.73E-09<br>2.73E-09       |
| 5                      | 28,774,907                                 | 28,939,485                              | <i>rs134199916*</i>         | Additive<br>Dominant     | 1.81E-08<br>1.81E-08       |

|   |             |             |                     |                      |                      |
|---|-------------|-------------|---------------------|----------------------|----------------------|
| 5 | 30,438,787  | 30,608,814  | <i>rs133335343*</i> | Additive<br>Dominant | 1.39E-09<br>1.09E-10 |
| 5 | 36,663,436  | 36,860,611  | <i>rs136252597</i>  | Additive<br>Dominant | 1.41E-10<br>1.41E-10 |
| 5 | 59,553,709  | 59,905,836  | <i>rs137261569*</i> | Additive<br>Dominant | 7.75E-26<br>7.75E-26 |
| 5 | 110,537,227 | 111,051,266 | <i>rs136545177*</i> | Recessive            | 5.50E-09             |
| 6 | 7,448,715   | 8,628,487   | <i>rs136663821</i>  | Dominant             | 5.59E-10             |
| 6 | 10,139,671  | 11,301,952  | <i>rs29019244</i>   | Dominant             | 5.86E-09             |
| 6 | 10,478,297  | 11,640,946  | <i>rs108963104*</i> | Dominant             | 1.16E-08             |
| 6 | 10,734,724  | 11,898,659  | <i>rs137187491</i>  | Additive<br>Dominant | 3.64E-08<br>3.64E-08 |
| 6 | 17,693,932  | 18,946,287  | <i>rs43456078</i>   | Recessive            | 2.32E-09             |
| 6 | 30,369,047  | 31,792,754  | <i>rs135006577</i>  | Additive<br>Dominant | 4.60E-18<br>4.60E-18 |
| 6 | 37,013,919  | 38,447,022  | <i>rs109381958*</i> | Additive<br>Dominant | 4.39E-26<br>4.39E-26 |
| 6 | 53,086,414  | 54,689,211  | <i>rs42762416</i>   | Additive<br>Dominant | 1.49E-11<br>1.49E-11 |
| 6 | 79,147,024  | 80,854,287  | <i>rs109934822*</i> | Recessive            | 6.90E-09             |
| 6 | 91,908,296  | 93,660,111  | <i>rs132854961</i>  | Recessive            | 8.38E-12             |
| 6 | 98,949,730  | 100,733,028 | <i>rs43488004</i>   | Additive<br>Dominant | 5.59E-10<br>1.68E-12 |
| 7 | 176,899     | 151,277     | <i>rs43114893</i>   | Recessive            | 1.61E-08             |
| 7 | 1,149,677   | 1,053,454   | <i>rs133295796</i>  | Additive<br>Dominant | 1.00E-17<br>100E-17  |
| 7 | 7,199,859   | 8,223,914   | <i>rs133396251*</i> | Additive<br>Dominant | 1.15E-09<br>4.78E-11 |
| 7 | 59,565,353  | 61,564,301  | <i>rs42852759*</i>  | Recessive            | 4.24E-08             |
| 7 | 78,348,022  | 80,634,324  | <i>rs132636869</i>  | Dominant             | 9.02E-10             |
| 7 | 97,540,689  | 99,952,417  | <i>rs110327822</i>  | Dominant             | 5.99E-10             |
| 8 | 20,675,446  | 20,685,523  | <i>rs109551298</i>  | Recessive            | 7.94E-09             |
| 8 | 20,721,025  | 20,731,035  | <i>rs43539285</i>   | Additive<br>Dominant | 7.91E-11<br>1.34E-10 |
| 8 | 29,565,411  | 29,615,889  | <i>rs134405734</i>  | Additive<br>Dominant | 1.25E-24<br>1.25E-24 |
| 8 | 58,921,513  | 59,331,066  | <i>rs136685338</i>  | Additive<br>Dominant | 1.60E-08<br>1.34E-08 |
| 8 | 65,837,664  | 66,316,372  | <i>rs133697170</i>  | Additive<br>Dominant | 4.44E-11<br>4.44E-11 |
| 8 | 77,981,766  | 79,362,912  | <i>rs134979587</i>  | Additive<br>Dominant | 9.72E-11<br>9.72E-11 |
| 8 | 111,550,769 | UK          | <i>rs134584163</i>  | Additive<br>Dominant | 1.24E-11<br>1.24E-11 |



|    |             |             |                     |                      |                      |
|----|-------------|-------------|---------------------|----------------------|----------------------|
| 9  | 6,538,240   | 6,661,699   | <i>rs110968046*</i> | Recessive            | 3.57E-08             |
| 9  | 43,839,708  | 44,351,018  | <i>rs110310103</i>  | Additive<br>Dominant | 1.26E-08<br>1.66E-10 |
| 9  | 64,893,414  | 65,812,782  | <i>rs110885320</i>  | Recessive            | 1.60E-08             |
| 9  | 74,687,743  | 75,695,000  | <i>rs134083077</i>  | Additive<br>Dominant | 3.76E-13<br>3.76E-13 |
| 10 | 43,101,892  | 43,145,489  | <i>rs109533748</i>  | Additive<br>Dominant | 1.37E-08<br>1.37E-08 |
| 10 | 62,992,388  | 63,217,046  | <i>rs133388647</i>  | Recessive            | 1.18E-08             |
| 10 | 67,250,158  | 67,481,157  | <i>rs29026382</i>   | Recessive            | 6.72E-10             |
| 10 | 76,396,374  | 76,708,701  | <i>rs132793686</i>  | Dominant             | 2.30E-10             |
| 10 | 80,522,688  | 80,873,088  | <i>rs110456535</i>  | Dominant             | 1.57E-09             |
| 11 | 16,856,558  | 16,878,438  | <i>rs109265815</i>  | Dominant             | 1.01E-08             |
| 11 | 77,409,930  | 77,475,988  | <i>rs109117330</i>  | Recessive            | 4.24E-08             |
| 11 | 106,236,174 | 105,879,823 | <i>rs136006377</i>  | Additive<br>Dominant | 1.08E-13<br>1.08E-13 |
| 12 | 62,999,694  | 63,506,888  | <i>rs42401835*</i>  | Additive<br>Dominant | 7.74E-10<br>7.74E-10 |
| 13 | 18,770,980  | 19,046,020  | <i>rs43010890</i>   | Recessive            | 2.73E-09             |
| 13 | 20,077,191  | 20,354,799  | <i>rs133469415</i>  | Additive<br>Dominant | 1.79E-09<br>1.79E-09 |
| 13 | 29,776,357  | 30,062,520  | <i>rs461403756</i>  | Dominant             | 1.81E-10             |
| 13 | 53,570,673  | 54,043,428  | <i>rs133341033</i>  | Additive<br>Dominant | 1.03E-20<br>1.36E-20 |
| 13 | 65,751,601  | 66,409,398  | <i>rs137078749</i>  | Additive<br>Dominant | 6.52E-09<br>8.70E-09 |
| 14 | 5,717,831   | 6,746,602   | <i>rs109419409</i>  | Additive<br>Dominant | 7.86E-10<br>2.39E-10 |
| 14 | 17,427,116  | 19,026,221  | <i>rs137303686</i>  | Additive<br>Dominant | 3.02E-14<br>3.02E-14 |
| 14 | 47,383,242  | 49,543,299  | <i>rs132969548</i>  | Additive<br>Dominant | 1.68E-12<br>1.68E-12 |
| 14 | 48,129,989  | 50,291,072  | <i>rs41913814</i>   | Recessive            | 3.35E-09             |
| 14 | 61,186,844  | 63,368,132  | <i>rs135824064</i>  | Additive<br>Dominant | 2.15E-09<br>2.15E-09 |
| 15 | 26,169,835  | 26,550,309  | <i>rs135503279</i>  | Dominant             | 1.09E-09             |
| 15 | 27,686,834  | 28,115,478  | <i>rs109754402</i>  | Dominant             | 1.08E-08             |
| 15 | 49,145,364  | 49,957,957  | <i>rs42582930*</i>  | Recessive            | 3.08E-08             |
| 15 | 60,599,380  | 61,384,207  | <i>rs137823813</i>  | Additive<br>Dominant | 2.28E-09<br>2.28E-09 |
| 15 | 67,918,952  | 68,743,862  | <i>rs42409285</i>   | Additive<br>Dominant | 3.01E-08<br>3.01E-08 |
| 16 | 591,660     | 387,363     | <i>rs133778157</i>  | Additive<br>Dominant | 5.68E-28<br>5.68E-28 |

|    |            |            |                     |                       |                      |
|----|------------|------------|---------------------|-----------------------|----------------------|
| 16 | 9,739,230  | 10,340,087 | <i>rs137501137*</i> | Additive<br>Recessive | 5.11E-10<br>1.12E-13 |
| 16 | 30,188,773 | 30,938,347 | <i>rs42397367*</i>  | Recessive             | 1.13E-08             |
| 16 | 52,005,041 | 53,254,900 | <i>rs137785107</i>  | Additive<br>Dominant  | 4.24E-16<br>4.24E-16 |
| 17 | 517,824    | 489,394    | <i>rs41834034</i>   | Recessive             | 4.57E-09             |
| 17 | 13,969,248 | 14,147,211 | <i>rs135563413*</i> | Dominant              | 2.08E-08             |
| 17 | 31,892,333 | 32,284,932 | <i>rs110556114</i>  | Dominant              | 4.90E-08             |
| 17 | 55,656,970 | 57,905,713 | <i>rs41846781</i>   | Dominant              | 1.85E-10             |
| 17 | 69,370,793 | 71,523,508 | <i>rs133533188</i>  | Additive              | 9.49E-09             |
| 17 | 72,930,491 | 74,944,074 | <i>rs133921184*</i> | Additive<br>Dominant  | 2.59E-23<br>5.98E-22 |
| 17 | 73,036,168 | 75,073,522 | <i>rs134240868</i>  | Recessive             | 2.08E-08             |
| 18 | 8,418,469  | 8,467,054  | <i>rs133533188</i>  | Additive<br>Dominant  | 4.34E-08<br>4.20E-08 |
| 18 | 8,895,233  | 8,946,233  | <i>rs109049561</i>  | Dominant              | 1.11E-08             |
| 18 | 26,260,207 | 26,345,070 | <i>rs132695972</i>  | Recessive             | 4.36E-08             |
| 18 | 49,932,292 | 50,210,007 | <i>rs109816901</i>  | Additive              | 3.21E-08             |
| 18 | 51,761,768 | 52,098,021 | <i>rs135795435</i>  | Additive<br>Dominant  | 2.24E-08<br>7.63E-12 |
| 19 | 2,455,040  | 2,536,668  | <i>rs109414660*</i> | Dominant              | 6.43E-09             |
| 19 | 8,798,124  | 9,030,243  | <i>rs55617305</i>   | Additive<br>Dominant  | 1.20E-08<br>1.59E-13 |
| 20 | 2,092,588  | 1,993,220  | <i>rs136404429</i>  | Additive<br>Dominant  | 4.90E-08<br>4.90E-08 |
| 20 | 23,863,171 | 23,886,196 | <i>rs41663374</i>   | Recessive             | 1.58E-11             |
| 20 | 27,079,454 | 27,092,889 | <i>rs109295451*</i> | Dominant              | 3.28E-08             |
| 20 | 56,858,708 | 56,934,353 | <i>rs135510586</i>  | Recessive             | 1.36E-08             |
| 21 | 24,108,341 | 24,575,987 | <i>rs137835919</i>  | Additive              | 4.93E-08             |
| 22 | 8,387,721  | 8,458,003  | <i>rs135197396</i>  | Additive<br>Dominant  | 3.37E-19<br>3.37E-19 |
| 22 | 28,163,493 | 28,283,571 | <i>rs110283240</i>  | Recessive             | 1.18E-08             |
| 22 | 28,460,191 | 28,580,713 | <i>rs110399563</i>  | Additive<br>Dominant  | 4.38E-13<br>4.38E-13 |
| 22 | 28,727,485 | 28,846,011 | <i>rs136708885</i>  | Dominant              | 2.69E-12             |
| 22 | 35,257,886 | 35,372,657 | <i>rs109203878</i>  | Additive<br>Dominant  | 1.61E-12<br>1.27E-13 |
| 22 | 38,471,613 | 38,612,397 | <i>rs109985339</i>  | Dominant              | 1.76E-08             |
| 22 | 54,996,329 | 55,634,857 | <i>rs109725058</i>  | Recessive             | 2.92E-13             |
| 23 | 4,277,670  | 4,197,354  | <i>rs110037746*</i> | Recessive             | 6.23E-11             |
| 23 | 29,137,447 | 28,938,184 | <i>rs41622011</i>   | Additive<br>Recessive | 9.36E-09<br>3.47E-08 |
| 23 | 29,706,398 | 29,507,533 | <i>rs110828627</i>  | Dominant              | 4.53E-09             |

|    |            |            |                     |                      |                      |
|----|------------|------------|---------------------|----------------------|----------------------|
| 23 | 35,342,022 | 35,114,464 | <i>rs110684599</i>  | Dominant             | 2.95E-09             |
| 26 | 7,685,740  | 7,709,388  | <i>rs133146678</i>  | Dominant             | 1.65E-11             |
| 26 | 14,468,328 | 14,512,486 | <i>rs109678718</i>  | Dominant             | 1.83E-09             |
| 26 | 31,462,025 | 31,743,621 | <i>rs110951772</i>  | Additive<br>Dominant | 2.65E-08<br>1.84E-08 |
| 26 | 32,979,983 | 33,257,060 | <i>rs42095933*</i>  | Dominant             | 1.13E-12             |
| 27 | 22,017,244 | 21,083,026 | <i>rs110750240</i>  | Dominant             | 4.93E-08             |
| 27 | 22,307,598 | 21,375,791 | <i>rs132728892</i>  | Additive<br>Dominant | 2.96E-08<br>2.96E-08 |
| 27 | 38,840,767 | 38,687,713 | <i>rs137177737</i>  | Dominant             | 9.90E-09             |
| 28 | 27,627,548 | 27,785,987 | <i>rs109367560</i>  | Dominant             | 3.21E-09             |
| 29 | 7,809,273  | 7,868,143  | <i>rs109712075</i>  | Additive<br>Dominant | 5.21E-12<br>1.17E-19 |
| 29 | 19,113,506 | 19,324,457 | <i>rs42169076*</i>  | Additive             | 3.76E-08             |
| 29 | 27,454,921 | 27,820,784 | <i>rs43170197*</i>  | Additive<br>Dominant | 2.67E-08<br>1.21E-10 |
| 29 | 29,747,595 | 30,121,059 | <i>rs109392783</i>  | Dominant             | 2.06E-13             |
| 29 | 39,677,851 | 40,370,794 | <i>rs42189563*</i>  | Additive<br>Dominant | 1.70E-08<br>5.49E-11 |
| 29 | 49,668,181 | 50,307,491 | <i>rs41586957*</i>  | Recessive            | 2.83E-08             |
| X  | 7,511,700  | 7,123,971  | <i>rs109930145</i>  | Dominant             | 2.56E-11             |
| X  | 15,770,097 | 15,668,542 | <i>rs132900305*</i> | Dominant             | 3.37E-09             |
| X  | 52,683,020 | 58,003,830 | <i>rs137585994</i>  | Additive<br>Dominant | 1.44E-13<br>1.44E-13 |

<sup>1</sup>Chromosome location of the locus; UK refers to an unassigned or unknown chromosomal location.

<sup>2</sup>Single nucleotide polymorphism (SNP) location as measured by numbered nucleotides in reference to the ARS 1.2 genome assembly ([https://www.animalgenome.org/repository/cattle/UMC\\_bovine\\_coordinates/](https://www.animalgenome.org/repository/cattle/UMC_bovine_coordinates/); accessed 19 September 2018).

<sup>3</sup>SNP location as measured by numbered nucleotides in reference to the UMD 3.1 genome assembly (<http://bovinegenome.org/?q=node/61>; accessed 2 April 2018); UK refers to an unassigned or unknown chromosomal location. If the SNP changed chromosomes between build this is noted before the bp position.

<sup>4</sup>The most significant SNP in the locus associated with cow conception rate as identified by *rs* number which is a reference number assigned to markers submitted to the National Center for Biotechnology Information SNP database (<https://www.ncbi.nlm.nih.gov/projects/SNP/>; accessed 2 April 2018).

<sup>5</sup>SNP located within previously identified copy number variations (CNVs) are denoted with an \*.

<sup>6</sup>Genome-wide association model.

<sup>7</sup>Significance (*P*-value) of the most significant SNP associated with cow conception rate.

**Table S4.** Loci associated with number of times bred to conception containing transcription factor binding sites.

| <b>SNP ID<sup>1</sup></b> | <b>BTA: position<sup>2</sup></b> | <b>Transcription Factor(s)<sup>3</sup></b> | <b>Species<sup>4</sup></b> | <b>Binding Site<sup>5</sup></b> | <b>RE Query<sup>6</sup></b> |
|---------------------------|----------------------------------|--------------------------------------------|----------------------------|---------------------------------|-----------------------------|
| <i>rs137156811</i>        | 1: 99,879,710                    | C/EBP $\alpha$                             | human                      | GAG[T/C]AA                      | 0.00834                     |
| <i>rs42215584</i>         | 1: 113,931,474                   | NF-1/L                                     | rat                        | T[A/G]GCA                       | 0.00976                     |
| <i>rs108949806</i>        | 2: 4,883,261                     | NF-1/L                                     | rat                        | T[A/G]GCA                       | 0.02631                     |
| <i>rs41636509</i>         | 2: 123,768,735                   | Nrf2:MafK                                  | rat                        | TCAGAA[C/T]                     | 0.00659                     |
|                           |                                  | POU2F1                                     | rat                        | AA[C/T]AAG                      | 0.02995                     |
| <i>rs132637832</i>        | 5: 17,922,992                    | SXR:RXR- $\alpha$                          | human                      | T[C/T]TGAAGTT                   | 0.00061                     |
|                           |                                  | Nrf2:MafK                                  | rat                        | TTT[C/T]TGA                     | 0.01379                     |
| <i>rs134199916</i>        | 5: 28,939,485                    | NF-AT1                                     | mouse                      | ATTTTC[C/T]                     | 0.00429                     |
|                           |                                  | AR                                         | human                      | TC[C/T]GTTC                     | 0.00204                     |
| <i>rs43456078</i>         | 6: 18,946,287                    | Nrf2:MafK                                  | rat                        | TCAGC[C/A]T                     | 0.00451                     |
| <i>rs135006577</i>        | 6: 31,792,754                    | Nrf2:MafK                                  | rat                        | TTG[C/T]TGA                     | 0.01135                     |
| <i>rs109934822</i>        | 6: 80,854,287                    | STAT4                                      | human                      | [G/A]GAAAT                      | 0.01355                     |
| <i>rs43114893</i>         | 7: 151,277                       | GR                                         | mouse                      | A[A/G]AACT                      | 0.00976                     |
| <i>rs109551298</i>        | 8: 20,685,523                    | JunD                                       | mouse                      | CC[T/G]GAC                      | 0.01236                     |
| <i>rs133697170</i>        | 8: 66,316,372                    | RXR- $\alpha$                              | human                      | [A/G]GTTCA                      | 0.00576                     |
| <i>rs110310103</i>        | 9: 44,351,018                    | 2-Dec                                      | mouse                      | GCT[T/G]CATTTG                  | 0.00007                     |
| <i>rs109533748</i>        | 10: 43,145,489                   | PR B                                       | human                      | AACA[A/G]TA                     | 0.00706                     |
|                           |                                  | PR A                                       | human                      | AACA[A/G]TA                     | 0.00706                     |
| <i>rs109265815</i>        | 11: 16,878,438                   | Fra-1                                      | rat                        | [T/G]CGTCA                      | 0.02218                     |
| <i>rs136006377</i>        | 11: 105,879,823                  | p53                                        | human                      | C[C/A]TGCCC                     | 0.00315                     |
| <i>rs42401835</i>         | 12: 63,506,888                   | NF-1/L                                     | rat                        | TGC[C/T]A                       | 0.01517                     |
| <i>rs42336979</i>         | 14: 60,164,356                   | Sp1                                        | pig                        | C[C/T]GCCC                      | 0.02824                     |
| <i>rs135503279</i>        | 15: 26,550,309                   | HNF-3 $\beta$                              | mouse                      | [C/A]AAAACA                     | 0.01181                     |
|                           |                                  | C/EBP $\alpha$                             | human                      | GAG[C/A]AA                      | 0.03462                     |
| <i>rs137823813</i>        | 15: 61,384,207                   | POU1F1b                                    | rat                        | AAAAT[C/T]AT                    | 0.02491                     |
|                           |                                  | POU1F1c                                    | rat                        | AAAAT[C/T]AT                    | 0.02491                     |
| <i>rs137501137</i>        | 16: 10,340,087                   | NF-1                                       | mouse                      | ATTG[A/G]C                      | 0.00565                     |
|                           |                                  | Cutl1                                      | mouse                      | ATTG[A/G]C                      | 0.0125                      |
| <i>rs42397367</i>         | 16: 30,938,347                   | Elk-1                                      | human                      | CTTC[C/T]GC                     | 0.0125                      |
| <i>rs137835919</i>        | 21: 24,575,987                   | NF-E2                                      | mouse                      | ACC[C/A]TGACTCAGC               | 0                           |
|                           |                                  | XBP-1                                      | human                      | [C/A]TGACT                      | 0.00606                     |
|                           |                                  | JunD                                       | mouse                      | C[C/A]TGAC                      | 0.00903                     |
| <i>rs135197396</i>        | 22: 8,458,003                    | JunD                                       | mouse                      | GTCAA[T/G]                      | 0.01308                     |
| <i>rs109203878</i>        | 22: 35,372,657                   | JunD                                       | mouse                      | [T/G]TCATG                      | 0.00817                     |
| <i>rs41622011</i>         | 23: 28,938,184                   | T3R- $\beta$                               | rat                        | GGTCA[C/T]C                     | 0.00209                     |
| <i>rs42916622</i>         | 29: 40,348,542                   | NF-1/L                                     | rat                        | [G/T]GGCA                       | 0.01871                     |
| <i>rs137585994</i>        | X: 58,003,830                    | ARP-1                                      | rat                        | T[A/G]ACCTTTG                   | 0.00042                     |
|                           |                                  | JunD                                       | mouse                      | CTT[A/G]AC                      | 0.01397                     |

<sup>1</sup>The most significant SNP in the locus as identified by *rs* number which is a reference number assigned to markers submitted to the National Center for Biotechnology Information SNP database (<https://www.ncbi.nlm.nih.gov/projects/SNP/>; accessed 2 April 2018).

<sup>2</sup>Single nucleotide polymorphism (SNP) location as measured by numbered nucleotides in reference to the UMD 3.1 genome assembly (<http://bovinegenome.org/?q=node/61>; accessed 2 April 2018).

<sup>3</sup>Gene symbol for the transcription factors whose binding sites spanned the locus.

<sup>4</sup>Species that the transcription factor binding site was identified in.

<sup>5</sup>Binding site for the transcription factor, with the SNP mutation in brackets. Bolded alleles are associated with the TFBS.

<sup>6</sup>Random expectation (RE) query values as calculated by the PROMO ([http://alggen.lsi.upc.es/cgi-bin/promo\\_v3/promo/promoinit.cgi?dirDB=TF\\_8.3](http://alggen.lsi.upc.es/cgi-bin/promo_v3/promo/promoinit.cgi?dirDB=TF_8.3); accessed 25 July 2018).

**Table S5.** List of positional candidate genes found to be differentially expressed by Moraes et al., (2018).

| <b>DE Comparison(s)<sup>1</sup></b>                                                                                                        | <b>Gene</b>         | <b>GWAA Phenotype(s)<sup>2</sup></b> |
|--------------------------------------------------------------------------------------------------------------------------------------------|---------------------|--------------------------------------|
| Pregnant Endometrium: High Fertile vs Subfertile<br>High Fertile: Pregnant vs Open Endometrium<br>Subfertile: Pregnant vs Open Endometrium | <i>NTRK2</i>        | Both                                 |
|                                                                                                                                            | <i>OAS2</i>         | CCR1                                 |
| Pregnant Endometrium: High Fertile vs Subfertile<br>High Fertile: Pregnant vs Open Endometrium                                             | <i>APH1B</i>        | CCR1                                 |
|                                                                                                                                            | <i>COL6A3</i>       | CCR1                                 |
|                                                                                                                                            | <i>PSD3</i>         | Both                                 |
|                                                                                                                                            | <i>PTGFRN</i>       | Both                                 |
| High Fertile: Pregnant vs Open Endometrium<br>Subfertile: Pregnant vs Open Endometrium                                                     | <i>APOBEC3A</i>     | Both                                 |
|                                                                                                                                            | <i>ARHGAP15</i>     | CCR1                                 |
|                                                                                                                                            | <i>LOC512869</i>    | CCR1                                 |
|                                                                                                                                            | <i>LOC781710</i>    | Both                                 |
|                                                                                                                                            | <i>MX1</i>          | CCR1                                 |
|                                                                                                                                            | <i>OAS1Y</i>        | CCR1                                 |
|                                                                                                                                            | <i>ROBO1</i>        | CCR1                                 |
|                                                                                                                                            | <i>TMTC2</i>        | Both                                 |
| Pregnant Endometrium: High Fertile vs Subfertile<br>Conceptuses: High Fertile vs Subfertile                                                | <i>RGL1</i>         | CCR1                                 |
|                                                                                                                                            |                     |                                      |
| High Fertile: Pregnant vs Open Endometrium                                                                                                 | <i>ADD2</i>         | CCR1                                 |
|                                                                                                                                            | <i>CA12</i>         | CCR1                                 |
|                                                                                                                                            | <i>CDH23</i>        | Both                                 |
|                                                                                                                                            | <i>FAM171A1</i>     | Both                                 |
|                                                                                                                                            | <i>HS6ST2</i>       | CCR1                                 |
|                                                                                                                                            | <i>LHFP</i>         | CCR1                                 |
|                                                                                                                                            | <i>LOC100848714</i> | Both                                 |
|                                                                                                                                            | <i>MAGI2</i>        | Both                                 |
|                                                                                                                                            | <i>MUM1</i>         | CCR1                                 |
|                                                                                                                                            | <i>NDRG3</i>        | Both                                 |
|                                                                                                                                            | <i>NFASC</i>        | CCR1                                 |
|                                                                                                                                            | <i>NUMBL</i>        | TBRD                                 |
|                                                                                                                                            | <i>OXCT1</i>        | CCR1                                 |
|                                                                                                                                            | <i>PDZRN3</i>       | Both                                 |
| <i>PRDM1</i>                                                                                                                               | Both                |                                      |
| <i>SF3A1</i>                                                                                                                               | TBRD                |                                      |

|                                         |                     |      |
|-----------------------------------------|---------------------|------|
|                                         | <i>SHROOM3</i>      | CCR1 |
|                                         | <i>SIK3</i>         | Both |
|                                         | <i>SLC8A1</i>       | CCR1 |
|                                         | <i>SPATS2</i>       | Both |
|                                         | <i>SYNE2</i>        | Both |
|                                         | <i>UGCG</i>         | CCR1 |
|                                         | <i>ZFP37</i>        | CCR1 |
|                                         | <i>ZNF331</i>       | CCR1 |
| Conceptuses: High Fertile vs Subfertile |                     |      |
|                                         | <i>ACADL</i>        | CCR1 |
|                                         | <i>ENAH</i>         | CCR1 |
|                                         | <i>FAHD2A</i>       | CCR1 |
|                                         | <i>FZD6</i>         | Both |
|                                         | <i>GJB5</i>         | Both |
|                                         | <i>LOC104970773</i> | CCR1 |
|                                         | <i>LOC504861</i>    | CCR1 |
|                                         | <i>LOC521902</i>    | Both |
|                                         | <i>NOD1</i>         | CCR1 |
|                                         | <i>NOTCH2</i>       | Both |
|                                         | <i>PRKG1</i>        | Both |
|                                         | <i>RNF224</i>       | Both |
|                                         | <i>SLC6A11</i>      | Both |
|                                         | <i>ST3GAL4</i>      | Both |

<sup>1</sup>Name of the fertility groups compared by Moraes et al. (2018).

<sup>2</sup>Phenotype(s) the positional candidate gene was associated with in the genome-wide association analysis (GWAA): cow conception rate at first AI (CCR1), number of times a cow was bred to achieve conception (TBRD), or both.
